# Supplementary material for: Tunable electronic and optoelectronic characteristics of two-dimensional β-AsP monolayer: a first-principles study
Source: Royal Society of Chemistry journal article supplement (doi:10.1039/d4cp02730b), 2024-01-01
Supplement: d4cp02730b1.pdf [file d4cp02730b1.pdf]

## Supplementary material

### **Tunable electronic and optoelectronic characteristics of two-dimensional $\beta$ -AsP monlayer: A first-principles study**

Zhong-Hui Xu,<sup>\*a,b,c,e</sup> Kaiyu Wei,<sup>a</sup> Zhengyu Wang,<sup>a</sup> Junlin Jiang,<sup>a</sup> Guogang Liu<sup>d</sup> and San-Huang Ke<sup>d</sup>

<sup>a</sup> School of Information Engineering, Jiangxi University of Science and Technology, Ganzhou 341000, China

<sup>b</sup> School of Science, Jiangxi University of Science and Technology, Ganzhou 341000, China

<sup>c</sup> Shanghai Key Laboratory of Special Artificial Microstructure Materials and Technology, Shanghai 200092, People's Republic of China

<sup>d</sup> MOE Key Laboratory of Microstructured Materials, School of Physics Science and Engineering, Tongji University, Shanghai 200092, China

<sup>e</sup> Jiangxi Province Key Laboratory of Multidimensional Intelligent Perception and Control, Ganzhou 341000, China

\* Corresponding Author.

E-mail addresses: longxister@163.com

## 1. The electronic structures of monolayer $\beta$ -AsP

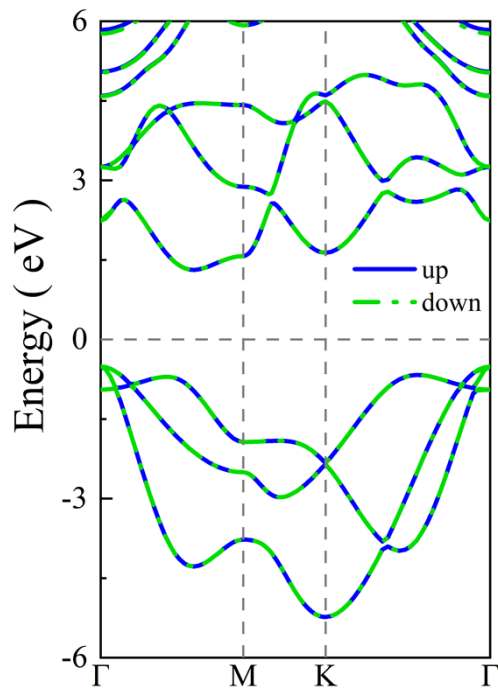

Fig. S1. Spin-polarized energy band structure of monolayer  $\beta$ -AsP.

## 2. The dynamic stability of monolayer $\beta$ -AsP

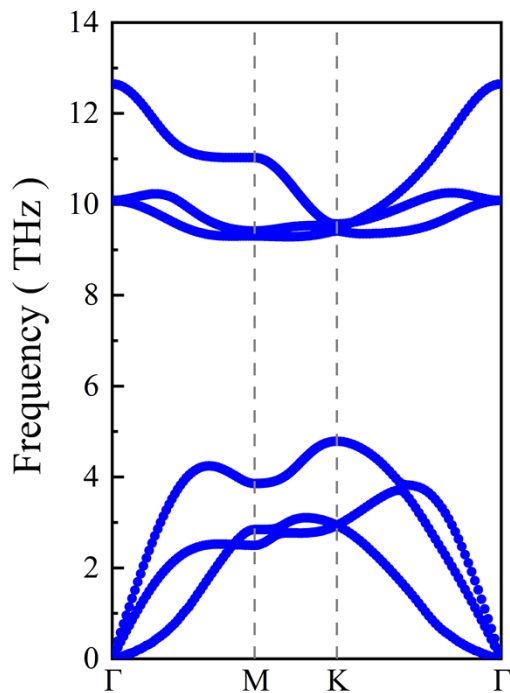

Fig. S2. Phonon spectrum of monolayer  $\beta$ -AsP.

### 3. Molecular dynamics simulations of monolayer $\beta$ -AsP

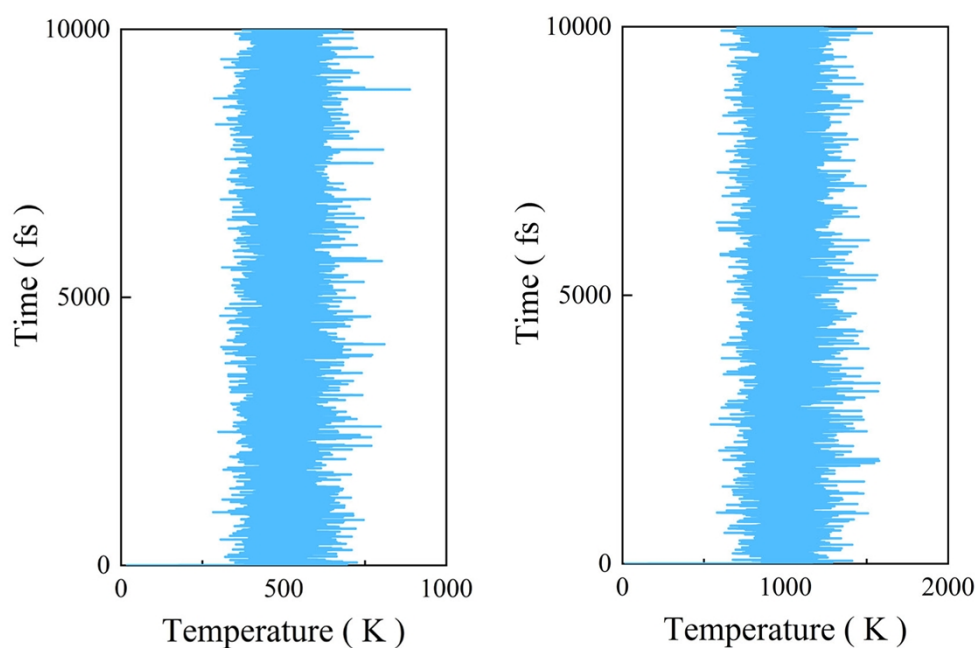

Fig. S3. The free energy variation over time (10.0 ps) of the  $\beta$ -AsP monolayer at temperatures of 500 K and 1000 K was obtained through atomic molecular dynamics (AIMD) simulations.

### 4. Optical properties of $\beta$ -AsP monolayers

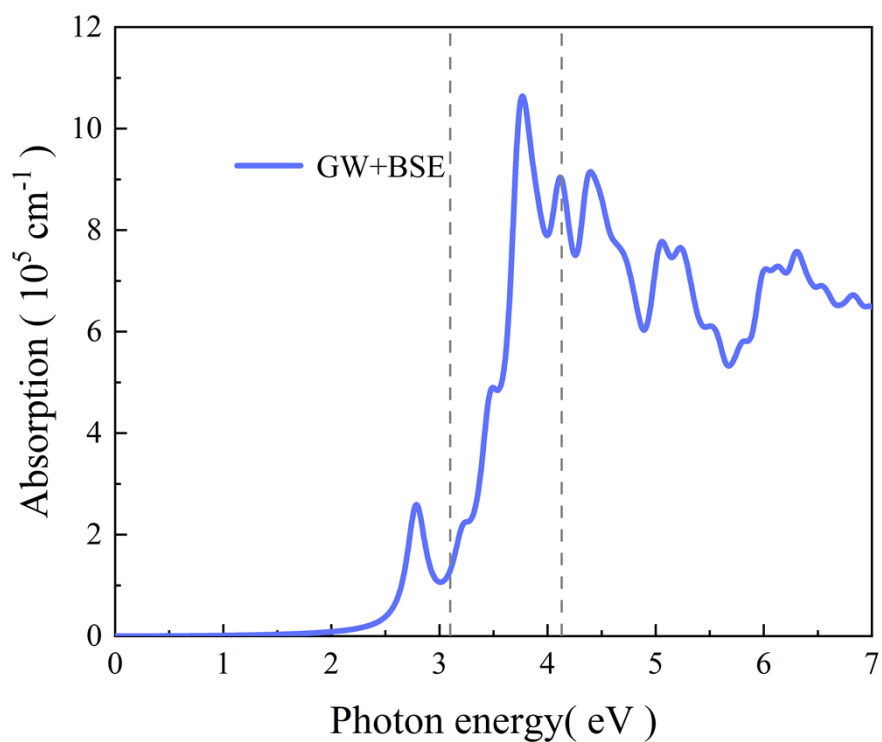

Fig. S4. calculation of light absorption coefficient of  $\beta$ -AsP monolayer using GW + BSE method.

### 5. Electronic structure of monolayer $\beta$ -AsP

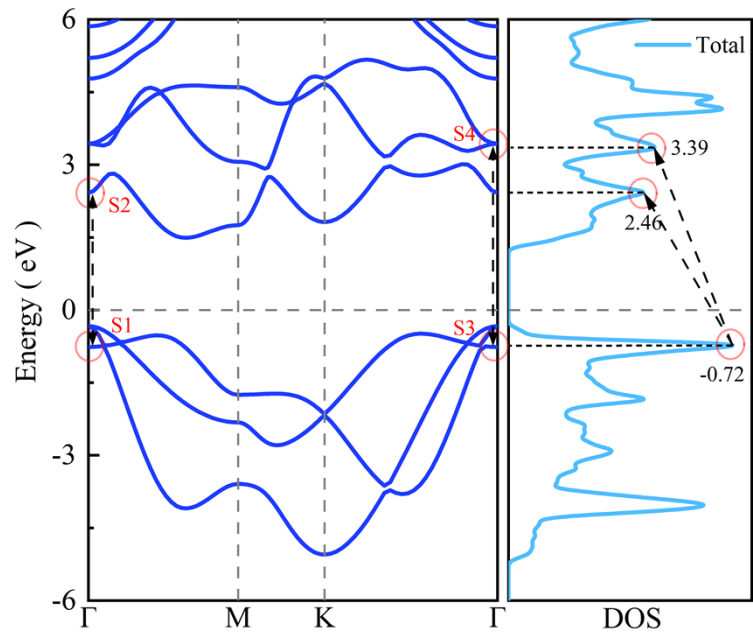

Fig. S5. Band structure and density of states with PBE functional for  $\beta$ -AsP monolayer.
